# Supplementary material
Source: MDPI journal article supplement (https://www.mdpi.com/2227-7099/11/2/70)
Supplement: s1 [file s1]

This Supplementary File belongs to the article

**Gynecological speculums in the context of the circular economy**

Contents:

1. The questionnaire incl. the informed consent (in Czech)
2. The questionnaire incl. the informed consent (in English, technical translation)
3. The formulas used in cost calculation (detailed)

Prohlašuji, že souhlasím s účastí na uvedeném projektu, o kterém jsem byl(a) informována prostřednictvím direct mailu.

Řešitelka projektu mne informovala o podstatě výzkumu a seznámila mne s cíli a metodami a postupy, které budou při výzkumu používány, podobně jako s výhodami a riziky, které pro mne z účasti na projektu vyplývají. Souhlasím s tím, že všechny získané údaje budou použity jen pro účely výzkumu a že výsledky výzkumu mohou být anonymně publikovány.

Měl/a jsem možnost vše si řádně, v klidu a v dostatečně poskytnutém čase zvážit, měl/a jsem možnost se řešitelky zeptat na vše, co jsem považoval/a za pro mne podstatné a potřebné vědět. Na tyto mé dotazy jsem dostal/a jasnou a srozumitelnou odpověď. Jsem informován/a, že mám možnost kdykoliv od spolupráce na projektu odstoupit, a to i bez udání důvodu.

Spustit dotazník

## 1. V jakém kraji se nachází zdravotnické zařízení, ve kterém pracujete?\*

Vyberte jednu nebo více odpovědí

- Hlavní město Praha
- Středočeský kraj
- Jihočeský kraj
- Plzeňský kraj
- Karlovarský kraj
- Ústecký kraj
- Liberecký kraj
- Královehradecký kraj
- Pardubický kraj
- Kraj Vysočina
- Jihomoravský kraj
- Olomoucký kraj
- Moravskoslezský kraj
- Zlínský kraj

## 2. V jakém zdravotnickém zařízení pracujete?\*

Vyberte jednu nebo více odpovědí

- Samostatná gynekologická ordinace

- Nemocnice

- Jiné...

### 3. Jaká je délka Vaší praxe v oboru gynekologie?\*

Vyberte jednu odpověď

- Méně než 5 let
- 5-15 let
- 16-25 let
- 26-35 let
- 36 let a více

### 4. Dáváte pacientkám na výběr, jaké gynekologické zrcadlo (jednorázové/opakovatelně použitelné) chtějí zvolit pro gynekologické vyšetření?\*

Vyberte jednu odpověď

- Ano
- Ne

### 5. Jaké gynekologické zrcadlo si pacientky spíše vybírají pro gynekologické vyšetření?\*

Vyberte jednu odpověď

- Jednorázové (plastové) gynekologické zrcadlo
- Opakovatelně použitelné (kovové) gynekologické zrcadlo
- Nelze určit

### 6. Při gynekologickém vyšetření používáte raději jednorázové nebo opakovatelně použitelné gynekologické zrcadlo?\*

Vyberte jednu odpověď

- Jednorázové (plastové) gynekologické zrcadlo
- Opakovatelně použitelné (kovové) gynekologické zrcadlo
- Obě varianty jsou pro mě z hlediska gynekologického vyšetření rovnocenné

## 7. Proč raději využíváte jednorázové gynekologické zrcadlo?\*

Vyberte jednu nebo více odpovědí

- Jsou lépe viditelné vyšetřované struktury
- Lépe se s nimi manipuluje a jsou lépe ovladatelné
- Nepotřeba dezinfekce a sterilizace
- Větší bezpečnost pro pacientku
- Dostatečný výběr velikostí a provedení
- Po aretaci udržují otevřenou polohu a umožňují vyšetření bez asistence zdravotní sestry
- Lépe se odebírá cytologický vzorek
- Lépe prostupuje do pochvy
- Jejich používání je méně nákladné

• Jiné...

## 8. Proč raději využíváte opakovatelně použitelné gynekologické zrcadlo?\*

Vyberte jednu nebo více odpovědí

- Jsou lépe viditelné vyšetřované struktury
- Lépe se s nimi manipuluje a jsou lépe ovladatelné
- Design je přizpůsoben snadnějšímu čištění
- Větší pevnost a odolnost proti rozbití
- Dostatečný výběr velikostí a provedení
- Jejich používání je méně nákladné

• Jiné...

## 9. Proč nerad/a využíváte jednorázové gynekologické zrcadlo?\*

Vyberte jednu nebo více odpovědí

- Nejsou dostatečně odolné (obava z prasknutí a síly materiálu)
- Nesprávně stanovená diagnóza přes průhledný plast kvůli silnému stlačení tkáně
- Možnost přehlédnutí patologie v pochvě
- Mají negativní dopad na životní prostředí

- Jiné...

## 10. Proč nerad/a využíváte opakovatelně použitelné gynekologické zrcadlo?\*

Vyberte jednu nebo více odpovědí

- Nutnost dezinfekce a sterilizace
- Vznik dodatečných nákladů na dezinfekci a sterilizaci
- Nutnost předehtřívání
- Hůře viditelné vyšetřované struktury a daný nález
- Nutná přítomnost zdravotní sestry, aby při vyšetření přidržovala gynekologické zrcadlo

- Jiné...

## 11. Používání, kterého gynekologického zrcadla si myslíte, že je více finančně nákladné?\*

Vyberte jednu odpověď

- Jednorázové (plastové) gynekologické zrcadlo
- Opakovatelně použitelné (kovové) gynekologické zrcadlo
- Myslím, že nákladovost zrcadel je přibližně stejná
- Nelze odhadnout

## 12. Zkuste odhadnout, v jakém procentuálním poměru využíváte jednorázová vs. opakovatelně použitelná gynekologická zrcadla?\*

Vyberte jednu odpověď

- Používám pouze jednorázová gynekologická zrcadla
- V 90 % používám jednorázová a ve zbylých 10 % opakovatelně použitelná
- V 70 % používám jednorázová a ve zbylých 30 % opakovatelně použitelná
- Jednorázová i opakovatelně použitelná gynekologická zrcadla používám ve stejném poměru (50 %:50 %)
- Ve 30 % používám jednorázová a ve zbylých 70 % opakovatelně použitelná
- V 10 % používám jednorázová a ve zbylých 90 % opakovatelně použitelná
- Používám pouze opakovatelně použitelná gynekologická zrcadla

- Jiné...

### 13. Jaké typy gynekologických zrcadel používáte?\*

Vyberte jednu nebo více odpovědí

- Jednorázová gynekologická zrcadla s aretací
- Jednorázová gynekologická zrcadla bez aretace
- Opakovatelně použitelná gynekologická zrcadla s aretací
- Opakovatelně použitelná gynekologická zrcadla bez aretace

- Jiné...

### 14. Myslíte si, že použití jednorázového gynekologického zrcadla při gynekologickém vyšetření představuje nějaké přínosy pro pacientku?\*

Vyberte jednu nebo více odpovědí

- Snižuje riziko šíření infekcí mezi pacientkami
- Optimální tepelná integrace (plast zabraňuje tepelnému šoku)
- Pro pacientku je pohodlnější oproti opakovatelně použitelnému
- Nemyslím si, že jednorázové gynekologické zrcadlo představuje přínosy pro pacientku

- Jiné...

### 15. Myslíte si, že použití opakovatelně použitelného gynekologického zrcadla při gynekologickém vyšetření představuje nějaké přínosy pro pacientku?\*

Vyberte jednu nebo více odpovědí

- Pro pacientku je pohodlnější oproti jednorázovému
- Pro dostatečnou pevnost se snižuje pravděpodobnost poranění pacientky
- Nemyslím si, že opakovatelně použitelné gynekologické zrcadlo představuje přínosy pro pacientku

- Jiné...

16. Myslíte si, že použití jednorázového gynekologického zrcadla při gynekologickém vyšetření představuje nějaké nevýhody pro pacientku?\*

Vyberte jednu nebo více odpovědí

- Jsou nepohodlné pro pacientku
- Mohou způsobit poranění tkáně
- Nežádoucí štípání čepele
- Nemyslím si, že jednorázové gynekologické zrcadlo představuje nevýhody pro pacientku

• Jiné...

17. Myslíte si, že použití opakovatelně použitelného gynekologického zrcadla při gynekologickém vyšetření představuje nějaké nevýhody pro pacientku?\*

Vyberte jednu nebo více odpovědí

- Možný přenos infekcí mezi pacientkami
- Jsou nepohodlné pro pacientku
- Mohou způsobit poranění tkáně
- Nemyslím si, že opakovatelně použitelné gynekologické zrcadlo představuje nevýhody pro pacientku

• Jiné...

18. Seřadte dle důležitosti aspekty, podle kterých se rozhodujete, zda si gynekologické zrcadlo zakoupíte.

Změňte pořadí položek dle svých preferencí (1. - nejdůležitější, 5. - nejméně důležitá)

---

*QUESTIONNAIRE: Disposable vs. reusable speculums in gynecological practice*

*(Technical translation of the Czech original into English for publication purposes only)*

---

I declare that I agree to participate in the above project, of which I have been informed by direct mail.

The project director informed me about the nature of the research and acquainted me with the objectives and the methods and procedures that will be used in the research, as well as with the benefits and risks of my participation in the project. I agree that all data collected will be used for research purposes only and that the results of the research may be published anonymously.

I had the opportunity to consider everything properly, calmly and in sufficient time, I had the opportunity to ask the research director about everything I considered essential and necessary for me to know. I received a clear and understandable answer to my questions. I have been informed that I have the possibility to withdraw from the project at any time, even without giving a reason.

Start the questionnaire

## 1. In which region is the healthcare facility where you work?\*

Select one or more answers

- The capital city of Prague
- Central Bohemia Region
- South Bohemia Region
- Pilsen Region
- Karlovy Vary Region
- Ústí nad Labem Region
- Liberec Region
- Kralovehradecky Region
- Pardubice Region
- Vysočina Region
- South Moravian Region
- Olomouc Region
- Moravian-Silesian Region
- Zlín Region

## 2. Which healthcare facility do you work in?\*

Select one or more answers

- Independent gynecological office
- Hospital

• Other...

### 3. What is your length of experience in gynecology?\*

Select one answer

- Less than 5 years
- 5-15 years
- 16-25 years
- 26-35 years
- 36 years and over

### 4. Do you give your patients the choice of which gynecological speculum (disposable/reusable) they want to have applied for gynecological examinations?\*

Select one answer

- Yes
- No

### 5. Which gynecological speculum are your patients more likely to choose for gynecological examinations?\*

Select one answer

- Disposable (plastic) gynecological speculum
- Reusable (metal) gynecological speculum
- Unable to determine

### 6. Do you prefer to use a disposable or reusable gynecological speculum for gynecological examinations?\*

Select one answer

- Disposable (plastic) gynecological speculum
- Reusable (metal) gynecological speculum
- Both options are equivalent for me in terms of gynecological examination

## 7. Why do you prefer to use disposable gynecological speculums?\*

Select one or more answers

- The structures under examination are better visible
- They are easier to handle and operate
- No need for disinfection and sterilization
- Greater safety for the patient
- Sufficient choice of sizes and designs
- Once locked, they maintain the open position and allow examination without nurse assistance
- Better cytology sample collection
- Penetrates better into vagina
- They are less expensive to use

• Other...

## 8. Why do you prefer to use reusable gynecological speculums?\*

Select one or more answers

- The structures under examination are better visible
- They are easier to handle and operate
- Design is adapted for easier cleaning
- Greater strength and resistance to breakage
- Sufficient choice of sizes and designs
- They are less expensive to use

• Other...

## 9. Why don't you like to use disposable gynecological speculums?\*

Select one or more answers

- They are not durable enough (concern about cracking and the strength of the material)
- Misdiagnosis through transparent plastics due to strong compression of tissue
- Possibility of overlooking pathology in the vagina

- Have a negative impact on the environment

- Other...

## 10. Why don't you like to use reusable gynecological speculums?\*

Select one or more answers

- Necessity of disinfection and sterilization
- Incurrence of additional disinfection and sterilization costs
- Need for preheating
- Structures and findings less visible
- Requires the presence of a nurse to hold the gynecological mirror during the examination

- Other...

## 11. Using which gynecological mirror you think is more costly?\*

Select one answer

- Disposable (plastic) gynecological speculum
- Reusable (metal) gynecological speculum
- I think the cost of speculums is about the same
- Can't estimate

## 12. Try to estimate in what proportion you use disposable and reusable gynecological speculums?\*

Select one answer

- I only use disposable gynecological speculums
- I use 90% disposable and the remaining 10% reusable
- I use disposable in 70% and reusable in the remaining 30%
- I use disposable and reusable gynecological speculums in the same ratio (50%:50%)
- I use disposable in 30% and reusable in the remaining 70%
- I use disposable in 10% and reusable in the remaining 90%
- I use only reusable gynecological speculums

- Other...

### 13. What types of gynecological speculums do you use?\*

Select one or more answers

- Disposable gynecological speculums with locking
- Disposable gynecological speculums without locking
- Reusable gynecological speculums with locking
- Reusable gynecological speculums without locking
- Other...

### 14. Do you think that the use of a disposable gynecological speculum during a gynecological examination presents any benefits to the patient?\*

Select one or more answers

- Reduces the risk of spreading infections between patients
- Optimal thermal integration (plastic prevents thermal shock)
- More comfortable for the patient compared to reusable
- I don't think a disposable gynecological speculum presents benefits to the patient
- Other...

### 15. Do you think that the use of a reusable gynecological speculum during a gynecological examination presents any benefits to the patient?\*

Select one or more answers

- It is more comfortable for the patient compared to a disposable
- For sufficient strength, the likelihood of injury to the patient is reduced
- I don't think a reusable gynecological mirror is beneficial to the patient
- Other...

### 16. Do you think that the use of a disposable gynecological speculum during a gynecological examination poses any disadvantages for the patient?\*

Select one or more answers

- They are uncomfortable for the patient
  - They can cause tissue injury
  - Unwanted pinching of the blade
  - I don't think a disposable gynecological speculum poses any disadvantages to the patient
- Other...

17. Do you think that the use of a reusable gynecological speculum during a gynecological examination poses any disadvantages for the patient?\*

Select one or more answers

- Possible transmission of infections between patients
  - They are uncomfortable for the patient
  - They can cause tissue injury
  - I don't think a reusable gynecological speculum poses any disadvantages to the patient
- Other...

18. Rank in order of importance the aspects you use to decide whether to buy a gynecological speculum.

Change the order of items according to your preferences (1 – the most important, 5 – the least important)

### The detailed (analytical) procedure for calculating the LCC:

The equation (1) used to calculate the total LCC value of a reusable GS in the given year includes cost categories and a discount factor:

$$LCCr = A + \sum_{t=1}^n \frac{M}{(1+i)^t} + \frac{D}{(1+i)^n} \quad (1)$$

where:

LCCr = life cycle cost for reusable GS

A = acquisition costs

M = service costs

D = disposal costs

i = discount rate

n = number of years

The equation (2) used to calculate the total LCC value of a disposable GS in the given year includes cost categories and a discount factor:

$$LCCd = \sum_{t=0}^n \frac{(A+D)}{(1+i)^t} \quad (2)$$

where:

LCCd = life cycle cost for disposable GS

A = acquisition cost

D = disposal costs

i = discount rate

n = number of years

Maintenance costs (M) are calculated according to the formula:

$$M = S + E + O \quad (3)$$

where:

S = costs for disinfection and cleaning

E = cost of operating the autoclave (sterilization)

O = cost of consumables

The costs of autoclave operation (E) are calculated according to the following formula:

$$E = (P \times T \times P_E) + (P_W \times V) \quad (4)$$

where:

P = input power of the sterilization device (autoclave) [kW]

T = time required for sterilization [hours]

P<sub>E</sub> = price of electricity [EUR/kWh]

P<sub>W</sub> = price of water [EUR/l]

V = volume of water required [l]

The costs of consumables (O) are calculated according to the following formula:

$$O = P_C + (P_W \times V) \quad (5)$$

where:

P<sub>C</sub> = cost of disinfectant used [EUR]

P<sub>W</sub> = price of water [EUR/l]

V = water volume [l]
